**ADULT INPATIENT PSYCHIATRIST/DIVISION CHAIR**  
Position F52380

The Department of Psychiatry at Virginia Commonwealth University (VCU) School of Medicine is seeking an accomplished and innovative Board Certified Psychiatrist to serve as Division Chair of its Adult Inpatient Services. This is an opportunity for a dynamic leader to help the Department of Psychiatry build collaborative relationships with clinicians, scientists, trainees, and students and to work across the university and externally. The successful candidate will have a leadership role in the department and hospital, reporting directly to the Department Chair. The incumbent will be expected to have administrative, leadership, teaching, and research experience. Resources will be available to the selected candidate to assist in building federally funded research studies/programs and recruiting other clinicians/investigators to the team. The successful candidate should have the vision and interest in helping VCU become a recognized leader in psychiatric care, scholarly activities, and research at the local, regional, national, and international level.

The core responsibilities of the Adult Inpatient Division Chair include, but are not limited to: managing and directing a 42-bed adult inpatient unit, supervising and training medical students, residents, and fellows, coordinating, developing and implementing best practices, some clinical duties, and developing/conducting research. Applicants should have a U.S. medical degree or equivalent (MD, MD/PhD, or DO), with licensure (or license eligible) to practice in the Commonwealth of Virginia and DEA licensure. Five to ten years of post-residency experience is required and fellowship training is preferred. Successful applicants will have demonstrated experience working in and fostering a diverse faculty, staff, and student environment, or commitment to do so as a faculty member at VCU.

Beginning in January 2020, Dr. Robert Findling will be VCU's Department of Psychiatry's Chair, who comes to us from Johns Hopkins. Dr. Findling's recruitment will serve as a catalyst for clinical growth as well as vigorous support for enhancement of scholarly activities both within the Adult Inpatient Division as well as the rest of the Department. VCU's Department of Psychiatry <http://psych.vcu.edu/> employs over 60 full-time faculty and has well-funded research in genetics <http://www.vipbg.vcu.edu/>, addictions [http://www.idas.vcu.edu](http://www.idas.vcu.edu/), child and women's mental health, and psychopharmacology. VCU Psychiatry is ranked #19 by NIH for research funding and its residents and faculty are ranked #1 for teaching in VCU's School of Medicine. VCU is a large urban university with a robust health science campus and 750-bed university hospital. Richmond, the State Capital, has a moderate climate and a rich mix of history with modern facilities, excellent suburban housing, public/private schools, and a low cost of living.

This is an excellent opportunity for an experienced clinician with interests in academic psychiatry. Salary, rank, and tenure status are contingent upon the candidate's qualifications. Interested applicants should apply online at <https://www.vcujobs.com/postings/96831>. Only electronic applications will be accepted. All submitted applications must include a letter of interest and CV. Questions should be directed to Tammy Beltz, HR Manager at [Tammy.Beltz@VCUHEALTH.org](mailto:Tammy.Beltz@VCUHEALTH.org).

Virginia Commonwealth University is an equal opportunity, Affirmative Action University providing access to education and employment without regard to age, race, color, national origin, gender, religion, sexual orientation, veteran's status, political affiliation or disability.

*"With mental health, addictions and neurosciences being a prominent strategic focus for us, we are committed to building on our academic strengths," said Michael Rao, Ph.D., President of VCU and VCU Health System.*



**Our Work Matters**

**Make a DIFFERENCE for those who need it THE MOST.**

**VISIT:**  
[Psychiatristjobs.la](http://Psychiatristjobs.la)

- Join the largest and most dynamic mental health department in the country
- Multiple avenues for advancement and professional development
- Flexible work schedules
- Unparalleled work-life balance
- Highly competitive benefits
- Competitive salary with potential bonuses of up to **\$32,000 annually**
- Student loan repayment incentive of up to **\$250,000**
- Reimbursement of eligible relocation costs of up to **\$15,000**

**LOS ANGELES COUNTY DEPARTMENT OF MENTAL HEALTH**  
hope. recovery. wellbeing.



**PSYCHIATRISTS**  
INPATIENT • OUTPATIENT

\$266,844 - \$320,640  
Board Certified annual salary

\$260,004 - \$311,592  
Board Eligible annual salary

California Correctional Health Care Services is seeking proactive, knowledgeable psychiatrists to join our multidisciplinary teams. Within the California Department of Corrections and Rehabilitation's facilities, you will find like-minded professionals well-versed in the intricate psychiatric and medical interplay necessary to treat our diverse patient population. Here, you will see and develop treatment plans for cases you won't encounter in any other practice. And with the support of our dedicated medical assistants, you'll be able to devote your time to practicing and honing advanced psychopharmacological skills. Plus, with locations throughout California, you're sure to find your perfect fit.

**In return for your efforts, we offer:**

- 40-hour workweek with flexible schedules, including 4/10s
- State of CA retirement that vests in five years
- Visa sponsorship opportunities
- \$10,000 Bonus to professionals newly hired with the State of CA
- Relocation assistance available to professionals newly hired with the State of CA

**Take the first step and contact us today:**  
LaTresse Phillips  
(916) 691-4818  
[CentralizedHiringUnit@cdcr.ca.gov](mailto:CentralizedHiringUnit@cdcr.ca.gov)

**CALIFORNIA CORRECTIONAL HEALTH CARE SERVICES**

[www.cchcs.ca.gov](http://www.cchcs.ca.gov)

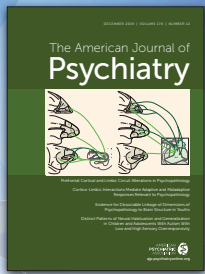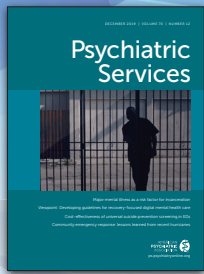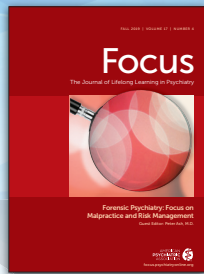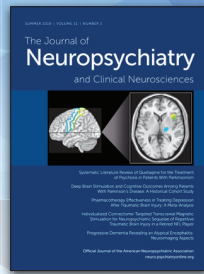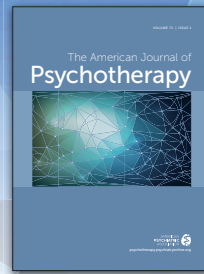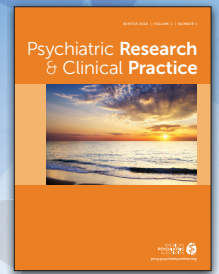

# Journals

from American Psychiatric Association Publishing

## The American Journal of Psychiatry

Official Journal of the American Psychiatric Association

**Editor-in-Chief: Ned H. Kalin, M.D.**

*The American Journal of Psychiatry* is the most widely-read psychiatric journal in the world. Published monthly, it is an indispensable journal for all psychiatrists and other mental health professionals who need to stay on the cutting edge of virtually every aspect of psychiatry. Reviews and overviews help to prepare for recertification and original research provides information on the latest advances in diagnosis, treatment, neuroscience, and patient populations.

## Focus

The Journal of Lifelong Learning in Psychiatry

**Editor: Mark Hyman Rapaport, M.D.**

*Focus* is the best system to meet the Maintenance of Certification requirements of the ABPN, self-assessment, Performance in Practice, and lifelong learning. In one subscription *Focus* provides a comprehensive review of current clinical practice based on the content outlined by the ABPN recertification exam. Each issue offers: Clinical Reviews, Patient Management Exercises, and Seminal Articles. Individual purchases of *Focus* subscriptions can earn CME credit.

## Psychiatric Services

A Journal of the American Psychiatric Association

**Editor: Lisa B. Dixon, M.D., M.P.H.**

*Psychiatric Services*, established in 1950, is published monthly by the American Psychiatric Association. The journal focuses on issues related to the delivery of mental health services, especially for people with severe mental illness in community-based treatment programs. Authors of research reports include psychiatrists, psychologists, pharmacists, and professionals in related systems, such as welfare and criminal justice systems.

## The Journal of Neuropsychiatry and Clinical Neurosciences

The Official Journal of the American Neuropsychiatric Association

**Editor: David B. Arciniegas, M.D.**  
**Deputy Editor: C. Alan Anderson, M.D.**

*The Journal of Neuropsychiatry and Clinical Neurosciences* is dedicated to advancing effective diagnosis and treatment options for patients with neuropsychiatric disorders. The journal publishes peer-reviewed articles addressing critical research areas such as Alzheimer's disease, traumatic brain injury, Parkinson's disease, epilepsy, and seizure disorders, and is devoted to reporting discoveries in clinical neuroscience that are relevant to understanding the brain-based disorders of patients.

## The American Journal of Psychotherapy

**Editor: Holly A. Swartz, M.D.**

*The American Journal of Psychotherapy* is a peer-reviewed, interdisciplinary journal published quarterly by the American Psychiatric Association. Begun in 1947 by the Association for the Advancement of Psychotherapy, *The American Journal of Psychotherapy* provides a forum for advancing the theory, science, and clinical practice of psychotherapy, publishing articles that expand the understanding of psychotherapies, especially in the domains of efficacy, process, education, and practice.

## Psychiatric Research and Clinical Practice

**Edited by Kimberly A. Yonkers, M.D.**

*Psychiatric Research and Clinical Practice* (PRCP) is a new peer-reviewed, open-access journal from the American Psychiatric Association that offers a high-profile publishing destination for peer-reviewed submissions that build upon the psychiatric knowledge base and bring research findings closer to clinical utility through deeper investigation.

Subscribe @ [www.appi.org](http://www.appi.org)

Email: [appi@psych.org](mailto:appi@psych.org) • Toll Free: 1-800-368-5777

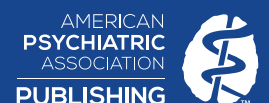

Priority Code AH2002A
