# Psychiatric Services

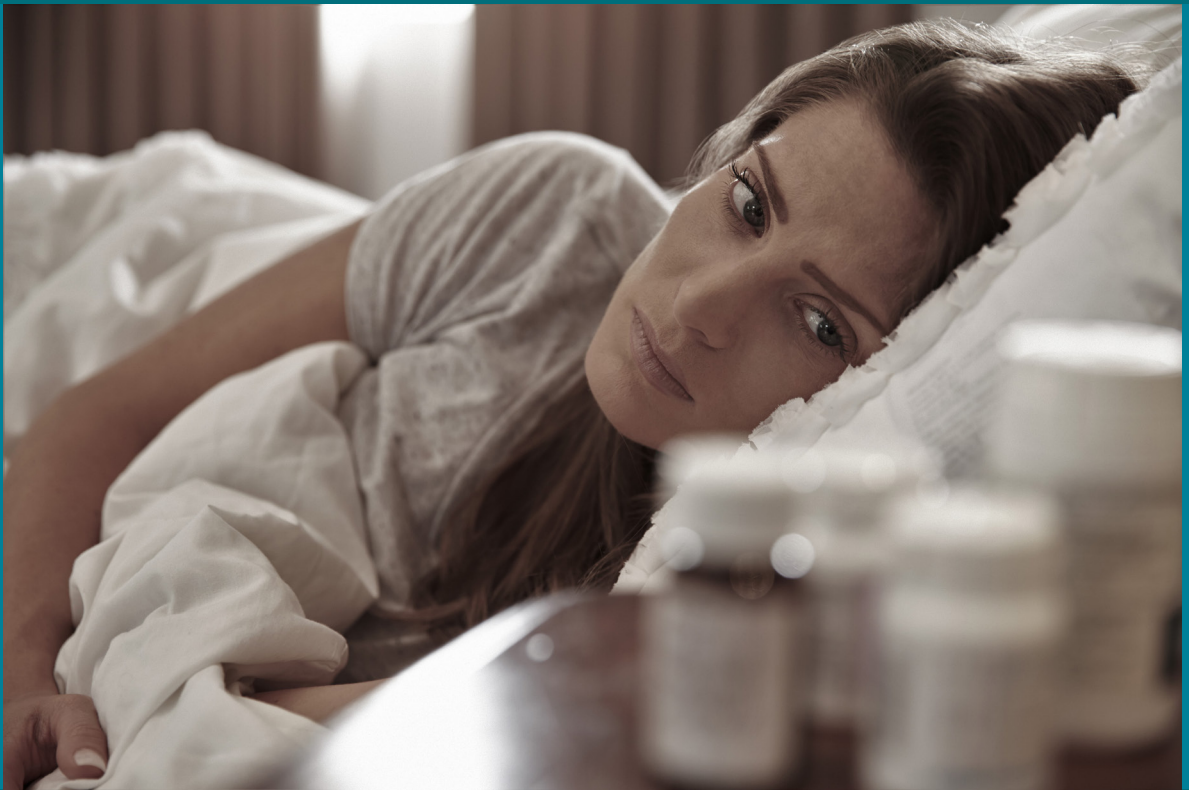

Personal Accounts: Using psychiatric medicine optimally to support recovery

Challenging the relationship between hospital and community-based psychiatry

Suicide prevention: crisis text lines and preserving the narrative in VA's Zero Suicide process

Scattergood report: challenging the criminalization hypothesis
